# Supplementary material
Source: PubMed Central journal article supplement (PMC2626445)
Supplement: jc.2008-0947_1.pdf [file jc.2008-0947_1.pdf]

## Supplemental table 1

**Allele and genotype distribution of the *PLIN* SNPs**

| <b>Allele</b>                                                | <b><i>n</i> (%)</b> | <b>Genotype</b> | <b><i>n</i> (%)</b> | <b><i>P</i> value</b> |
|--------------------------------------------------------------|---------------------|-----------------|---------------------|-----------------------|
| <b><i>PLIN1</i> - 6209 T&gt;C (rs2289487)</b>                |                     |                 |                     |                       |
| <b>T</b>                                                     | <b>242 (51.7)</b>   | <b>TT</b>       | <b>65 (27.8)</b>    | <b>0.52</b>           |
| <b>C</b>                                                     | <b>226 (48.3)</b>   | <b>TC</b>       | <b>112 (47.9)</b>   |                       |
|                                                              |                     | <b>CC</b>       | <b>57 (24.4)</b>    |                       |
| <b><i>PLIN4</i> - 11482 G&gt;A (rs894160)</b>                |                     |                 |                     |                       |
| <b>G</b>                                                     | <b>328 (70)</b>     | <b>GG</b>       | <b>116 (49.6)</b>   | <b>0.74</b>           |
| <b>A</b>                                                     | <b>140 (30)</b>     | <b>GA</b>       | <b>96 (41)</b>      |                       |
|                                                              |                     | <b>AA</b>       | <b>22 (9.4)</b>     |                       |
| <b><i>PLIN5</i> - 13041 T&gt;C (rs2304795)</b>               |                     |                 |                     |                       |
| <b>A</b>                                                     | <b>287 (62.3)</b>   | <b>AA</b>       | <b>87 (37.7)</b>    | <b>0.55</b>           |
| <b>G</b>                                                     | <b>175 (37.7)</b>   | <b>AG</b>       | <b>113 (48.9)</b>   |                       |
|                                                              |                     | <b>GG</b>       | <b>31 (13.4)</b>    |                       |
| <b><i>PLIN6</i> - 14995 A&gt;T (rs1052700)</b>               |                     |                 |                     |                       |
| <b>A</b>                                                     | <b>348 (74.4)</b>   | <b>AA</b>       | <b>134 (57.3)</b>   | <b>0.11</b>           |
| <b>T</b>                                                     | <b>120 (25.6)</b>   | <b>AT</b>       | <b>80 (34.2)</b>    |                       |
|                                                              |                     | <b>TT</b>       | <b>20 (8.5)</b>     |                       |
| P value assessed by Hardy-Weinberg equilibrium $\chi^2$ test |                     |                 |                     |                       |
